# Supplementary material for: Expression profiling of Echinococcus multilocularis miRNAs throughout metacestode development in vitro
Source: PLoS Negl Trop Dis. 2021 Mar 22;15(3):e0009297. doi: 10.1371/journal.pntd.0009297 (PMC8016320; doi:10.1371/journal.pntd.0009297)
Supplement: S2 Table — (XLSX) [file pntd.0009297.s007.xlsx]

## Sheet: Hoja1
S2 Table. Echinococcus multilocularis microRNA (miRNA) sequences identified in this study and their genome location.
miRNA name	Mature sequence (5'-3')	Length (nt)	Star sequence (5'-3')	Precursor sequence (5’-3’)	Length (nt)	Scaffold (Chromosome) a	Start	End	Strand	Overlapping geneb	Genomic location
emu-bantam-3p	UGAGAUCGCGAUUACAGCUGAU	22	CGGCUUUUCUCGCGUUCUGAGA	CGGCUUUUCUCGCGUUCUGAGAGCGUUAAUUCUCUAGUUAAACUACCGCCUUCUGAGAUCGCGAUUACAGCUGAU	75	pathogen_EmW_scaffold_06	6070307	6070381	-	n/o	intergenic
emu-let-7-5p	UGAGGUAGUGUUUCGAAUGUCU	22	ACAUCCGUUUCACUAUCUGCAUA	UGCUGACAAUGUGAGGUAGUGUUUCGAAUGUCUCUGGCACUAGCGACAUCCGUUUCACUAUCUGCAUAUUGCGGCGC	77	pathogen_EmW_scaffold_09	3379983	3380059	-	n/o	intergenic
emu-miR-1-3p	UGGAAUGUUGUGAAGUAUGU	20	GCUUCCCAAUAGGCCAUA	GCUUCCCAAUAGGCCAUAGAGUAAGUCCCUACACCUAUGGGGAUCUAUGGAAUGUUGUGAAGUAUGU	67	pathogen_EmW_scaffold_03	10157056	10157122	-	n/o	intergenic
emu-miR-2a-3p	AAUCACAGCCCUGCUUGGAACC	22	CGUUCCAGGGGGAUGUGAGUUU	CUUCGAACCUCCCUACGUUCCAGGGGGAUGUGAGUUUAUACAGCCUAUGAAUCACAGCCCUGCUUGGAACCAAAGGAGCUUCCU	84	pathogen_EmW_scaffold_03	9454673	9454756	-	n/o	intergenic
emu-miR-2b-3p	UAUCACAGCCCUGCUUGGGACA	22	UGUCCCAAGGGUGGUGAUCUACU	UGUCAGUCGGUGUCCCAAGGGUGGUGAUCUACUCAGUUGGAGUAUCACAGCCCUGCUUGGGACACAUGCUGGCAGC	76	pathogen_EmW_scaffold_05	10601900	10601975	-	n/o	intergenic
emu-miR-2c-3p	__UCACAGCCAAUAUUGAUGAA	20	UCGUCAACAUUGCCUGUAGA	GGGCGUUGUUCGUCGUCAACAUUGCCUGUAGACACGGGUUGCGAUGUCACAGCCAAUAUUGAUGAACGAGUGGCGUCU	78	pathogen_EmW_scaffold_05	10602005	10602082	-	n/o	intergenic
emu-miR-7a-5p	UGGAAGACUGGUGAUAUGUUGU	22	CAGCGUAUCGCAGUUUUUCCCUA	CAUUGCUUUUGUGGAAGACUGGUGAUAUGUUGUAAAGCUCCCCUACCAUACAGCGUAUCGCAGUUUUUCCCUAAAAACAUU	81	pathogen_EmW_scaffold_02	5621484	5621564	-	n/o	intergenic
emu-miR-7b-5p	UGGAAGACUUGUGAUUAGAUUGUU	24	CAACUGUCACGGUCUUCCAAG	UGGAAGACUUGUGAUUAGAUUGUUACGCAUAUUCCCUUUUGUGAUCAUGUAAAUGAGCAGCAAAUGAACAUCUUAACAACUGUCACGGUCUUCCAAG	97	pathogen_EmW_scaffold_01	11571267	11571363	+	n/o	intergenic
emu-miR-8-3p	UAAUACUGUUCGGUUAGGACGCC	23	GUAGUCUUCCGAGCAGUAUAUGG	CGAGGCAUUGUGGUAGUCUUCCGAGCAGUAUAUGGACGUUUUGAUUGGUCCACCGUUCCAAUAGCUCCUAAUACUGUUCGGUUAGGACGCCACAGUGGCU	100	pathogen_EmW_scaffold_04	1211212	1211311	-	n/o	intergenic
emu-miR-9-5p	UCUUUGGUUAUCUAGCUGUGUG	22	CAAGGCUAGAUUUCCAAACAAA	UAGUUGCCAUUCUUUGGUUAUCUAGCUGUGUGAGGUUUAGCUUCAGUCAGCUCUUAUUUUCACAAGGCUAGAUUUCCAAACAAACGCAUCUAA	93	pathogen_EmW_scaffold_02	10485889	10485981	+	n/o	intergenic
emu-miR-10-5p	CACCCUGUAGACCCGAGUUUGA	22	GCUCGUGUCUUCAAGGAAUC	CACCCUGUAGACCCGAGUUUGAGUGCCUAGCGUACGUUCCACCGUACAGACUCCCAAGCUCGUGUCUUCAAGGAAUCA	78	pathogen_EmW_scaffold_01	7241820	7241897	-	n/o	intergenic
emu-miR-31-5p	UGGCAAGAUACUGGCGAAGCUGA	23	AGCUUCGUCUGGUCUUGCUGCA	UGGCAAGAUACUGGCGAAGCUGAGGGGUCAAGUAAUCGUCAGCUUCGUCUGGUCUUGCUGCA	62	pathogen_EmW_scaffold_06	36633	36694	+	n/o	intergenic
emu-miR-36a-3p	UCACCGGGUAGACAUUCCUUGC	22	ACGGAUUGUCCAUCCGGUAACC	ACGGAUUGUCCAUCCGGUAACCGCGAUAAGGUGAAGGCCUUUUUAACUGCUGGUCACCGGGUAGACAUUCCUUGC	75	pathogen_EmW_scaffold_02	16452646	16452720	-	n/o	intergenic
emu-miR-36b-3p	UCACCGGGUAGUUAUUACGCCU	22	GAGUAAUUUCUAUCCGGUUGGUG	GAGUAAUUUCUAUCCGGUUGGUGUUUUCCGGGGAACACUAGUGUGUCCUCUAUGUCCAAGGCAUCACCGGGUAGUUAUUACGCCU	85	pathogen_EmW_scaffold_02	8988590	8988674	-	n/o	intergenic
emu-miR-61-3p	UGACUAGAAAGAGCACUCACAUC	23	CGUGAGGCCCUUUCUUGUGCAUG	CGUGAGGCCCUUUCUUGUGCAUGGAUAAUGAAGGGUCUUUAAACCUCGACCAUGACUAGAAAGAGCACUCACAUC	75	pathogen_EmW_scaffold_02	7784004	7784078	-	n/o	intergenic
emu-miR-71-5p	UGAAAGACGAUGGUAGUGAGA	21	UCUUGCUACUCCGUCUUUUCCU	UUGGCAGUCAUCUCGUGAAAGACGAUGGUAGUGAGAUACAGAGGAAUCGAGCAUCUUGCUACUCCGUCUUUUCCUAAGAUGCUGCU	86	pathogen_EmW_scaffold_05	10602100	10602185	-	n/o	intergenic
emu-miR-87-3p	GUGAGCAAAGUUUCAGGUGU	20	CCACCUGUCAUUUUGCUCGAACC	CCACCUGUCAUUUUGCUCGAACCAGAGUUAUUCUUGGCGUCAUCCAUCUCUCGAAGGAUGUUUGCUAGGUUGGUGAGCAAAGUUUCAGGUGU	92	pathogen_EmW_scaffold_02	3822908	3822999	-	n/o	intergenic
emu-miR-96-5p	AUUGGCACUUUUGGAAUUGUC	21	GACGGUCUAAAAGUGCCGA	AUUGGCACUUUUGGAAUUGUCACCAGUGUUCCCCUCGACUCGACGCUGGCGGUGGUGCCUUUGAGGGUUUGCGGUGACGGUCUAAAAGUGCCGA	94	pathogen_EmW_scaffold_06	6799591	6799684	-	EmuJ_000086300	intronic
emu-miR-124a-3p	UAAGGCACGCGGUGAAUGCCA	21	GCGUUCAACCUCGGAGCCUUUGUC	UGUCAAGCACGUGAAAUGGCGUUCAACCUCGGAGCCUUUGUCAGCGAUUGAAUUAAGGCACGCGGUGAAUGCCAAAUGCGAUGCUCC	87	pathogen_EmW_scaffold_06	660028	660114	+	n/o	intergenic
emu-miR-124b-3p	UAAGGCACGCGGUGAAUACC	20	GUAUUCUACGCGAUGUCUUGGU	GUGAAUUUGGUAUUCUACGCGAUGUCUUGGUACGAGCUGACACUAAGGCACGCGGUGAAUACCAAGGUCC	70	pathogen_EmW_scaffold_03	10946292	10946361	+	n/o	intergenic
emu-miR-125-5p	UCCCUGAGACCCUAGAGUUGUC	22	CAACUCUAAUGUCCCGGGUUA	CAUGUCCCUGAGACCCUAGAGUUGUCCGGAAUUUGCGAAUCCACAUUUCUCGCGUGGCAACUCUAAUGUCCCGGGUUAUGAG	82	pathogen_EmW_scaffold_02	6361992	6362073	+	n/o	intergenic
emu-miR-133-3p	UUGGUCCCCAUUAACCAGCCGCC	23	GGCUGAUUUGUGGGGCUCAGAA	GGCUGAUUUGUGGGGCUCAGAAAAGCUGUAAAUGAAAACUUUUGGUCCCCAUUAACCAGCCGCC	64	pathogen_EmW_scaffold_03	10145328	10145391	-	n/o	intergenic
emu-miR-153-3p	UUGCAUAGUCUCAUAAGUGCCA	22	AUGCUUACGAGACGUGCACUC	AGUCGUAAAUGCUUACGAGACGUGCACUCCAGUUGGAAUGGUUGUCAACCACCUUGUGGAUUGCAUAGUCUCAUAAGUGCCAUCGACU	88	pathogen_EmW_scaffold_01	16009193	16009280	+	n/o	intergenic
emu-miR-184-3p	GGGACGGAAGUCUGAAAGGUUU	22	ACCUAUCACACUUCAGUCCAGU	GAUUCCACAUUGUUAUACCUAUCACACUUCAGUCCAGUACGAAUUGUGUAUGGGACGGAAGUCUGAAAGGUUUAAACAUGUG	82	pathogen_EmW_scaffold_06	2771719	2771800	+	n/o	intergenic
emu-miR-190-5p	AGAUAUGUUUGGGUUACUUGGUGCU	25	CCAGUGACCAAACAUAUUC	UCGACAAUGAGAUAUGUUUGGGUUACUUGGUGCUGUGCUCUAUCCUCUUACACCAGUGACCAAACAUAUUCACAUUGUU	79	pathogen_EmW_scaffold_02	617450	617528	+	EmuJ_000736000	intronic
emu-miR-219-5p	UGAUUGUCCAUUCGCAUUUCUUG	23	AGAUGUGUGUAUGGGCAUCGCA	AGUGCUCUGAUUGUCCAUUCGCAUUUCUUGCUGCUCUCGUGUACAAUUCACUGUUCUUCAAGAUGUGUGUAUGGGCAUCGCAGUACU	87	pathogen_EmW_scaffold_04	4700723	4700809	-	n/o	intergenic
emu-miR-277a-3p	UAAAUGCAUUUUCUGGCCCGUA	22	GGGUAGAAAGUGCCUUUUACA	GGGUAGAAAGUGCCUUUUACAACAUGCUGCCUCUAUGAGAUCCACUUAUGUUUGUAAAUGCAUUUUCUGGCCCGUAACC	79	pathogen_EmW_scaffold_01	4971901	4971979	-	n/o	intergenic
emu-miR-277b-3pc	UAAAUGCAAAAUAUCUGGUUAUG	23	AGACCAGAUUUUGCAGUUUAUA	AGACCAGAUUUUGCAGUUUAUAACGCUACCCACUAAAAGAGUAUAAAUGCAAAAUAUCUGGUUAUG	66	pathogen_EmW_scaffold_02	5819498	5819563	+	n/o	intergenic
emu-miR-4989-3p	AAAAUGCACCAACUAUCUGAGA	22	UGGGUAGUCGUUGCAUUUCC	ACGCUGGGUAGUCGUUGCAUUUCCACACUGCUGCAAGGUAGCAGCUGAAAGAGGGUGAAAAUGCACCAACUAUCUGAGAU	80	pathogen_EmW_scaffold_01	4972036	4972115	-	n/o	intergenic
emu-miR-281-3p	UGUCAUGGAGUUGCUCUCU	19	AGGGCCCUUUAUGACCCU	AGGGCCCUUUAUGACCCUUGAGAAAUAAGUCAAUGUCAUGGAGUUGCUCUCU	52	pathogen_EmW_scaffold_01	11092499	11092550	-	n/o	intergenic
emu-miR-307-3p	UCACAACCUACUUGAUUGAGGGG	23	CCUCAUCCCGUGGGUUGAGCGAUG	CCUCAUCCCGUGGGUUGAGCGAUGCCUUUGUGUUCCGCACCUCUAUGCGCAUCACAACCUACUUGAUUGAGGGG	74	pathogen_EmW_scaffold_01	954378	954451	-	n/o	intergenic
emu-miR-745-3p	UGCUGCCUGGUAAGAGCUGUGA	22	CCAGUUCUUAUCGGGUAUAUCAUG	UCAGUUUUUGUGCCAGUUCUUAUCGGGUAUAUCAUGCCGCCAUUUCAUGCUGCCUGGUAAGAGCUGUGACAAAAAUUG	78	pathogen_EmW_scaffold_01	6488187	6488264	+	n/o	intergenic
emu-miR-1992-3p	UCAGCAGUUGUACCAUUGAAAU	22	UUUCAUUGGUCAAUUGCUAA	UUUCAUUGGUCAAUUGCUAAUAUUUCUUGCGUUAAUUUACAAAUAUCAGCAGUUGUACCAUUGAAAU	67	pathogen_EmW_scaffold_09	3082706	3082772	+	n/o	intergenic
emu-miR-2162-3p	UAUUAUGCAACUUUUCACUCC	21	AGUGGAUUUGUUGCAUAUUAUACA	AGUGGAUUUGUUGCAUAUUAUACAUCGUGGGGUUUGUAUUAUGCAACUUUUCACUCC	57	pathogen_EmW_scaffold_03	11957846	11957902	-	n/o	intergenic
emu-miR-3479a-3p	UAUUGCACGUUCUUUCGCCAUC	22	CGGUGAAAGUUUAUGCAUUUACA	CGGUGAAAGUUUAUGCAUUUACAUCGGUUGAUGUAUUGCACGUUCUUUCGCCAUC	55	pathogen_EmW_scaffold_01	11565503	11565557	-	n/o	intergenic
emu-miR-3479b-3p	GAUUGCACUACCCAUCGCCCAC	22	UGGCGGUGCGCGGUGCAAUUUCUG	UGGCGGUGCGCGGUGCAAUUUCUGUUAACCCGCUUUCUUGAGUGCAGAUUGCACUACCCAUCGCCCACA	69	pathogen_EmW_scaffold_04	4403743	4403811	-	EmuJ_000212600	intronic
emu-miR-10293-3pd	UAAUUCGAGUCAACAGGGUCGUU	23	GGACUCGUUUACUCGAAUUGGU	GGACUCGUUUACUCGAAUUGGUCUGCGUGGGGCACUAAUUCGAGUCAACAGGGUCGUU	58	pathogen_EmW_scaffold_08	2743188	2743245	+	n/o	intergenic
a According to WormBase ParaSite version: WBPS14 (WS271).
b Only miRNAs overlapping a coding gene with a predicted functional annotation and in the same orientation were considered intronic miRNAs.
c Previously reported as miR-new-2-3p by Cucher et al. (2015)
d Previously reported as miR-new-1-3p by Cucher et al. (2015)
n/o: without overlapping
