# Supplementary material for: Expression profiling of Echinococcus multilocularis miRNAs throughout metacestode development in vitro
Source: PLoS Negl Trop Dis. 2021 Mar 22;15(3):e0009297. doi: 10.1371/journal.pntd.0009297 (PMC8016320; doi:10.1371/journal.pntd.0009297)
Supplement: S5 Table — (XLSX) [file pntd.0009297.s010.xlsx]

## Sheet: Hoja1
S5 Table. All predicted target sites of the most expressed microRNAs (miRNAs) in Echinococcus multilocularis using miRanda algorithm.
miRNA	Gene ID	Gene Description a	Score	Energy (kCal/Mol)	miRNA_start	miRNA_end	UTR_start	UTR_end	length of the alignment	identity (%)
emu-miR-10-5p	EmuJ_000468500	Chmp1 chromatin modifying protein	162	-24.66	2	21	361	385	22	68.18%
emu-miR-10-5p	EmuJ_001047800	Nucleolar protein c7c	152	-19.66	2	21	300	318	19	68.42%
emu-miR-10-5p	EmuJ_000765400	Protein lin 9	154	-17.21	2	19	156	177	17	70.59%
emu-miR-10-5p	EmuJ_000586300	Coiled coil domain containing protein 40	146	-22.74	2	21	65	85	19	63.16%
emu-miR-10-5p	EmuJ_000770900	Immunoglobulin subtype	145	-17.67	2	19	29	51	18	66.67%
emu-miR-10-5p	EmuJ_000389600	Mitogen activated protein kinase kinase kinase	160	-22.82	2	21	339	359	20	80.00%
emu-miR-10-5p	EmuJ_000863500	Autophagy-related protein 9	143	-24.49	2	16	362	383	14	71.43%
emu-miR-10-5p	EmuJ_001178200	n/a	151	-20.26	2	12	225	246	10	90.00%
emu-miR-10-5p	EmuJ_000365400	Upstream transcription factor 1	146	-20.93	2	16	215	239	17	70.59%
emu-miR-10-5p	EmuJ_000109300	Son of sevenless 1	147	-17.8	2	12	228	249	10	90.00%
emu-miR-10-5p	EmuJ_000870700	Apobec1 complementation factor	147	-18.36	2	12	199	220	10	90.00%
emu-miR-10-5p	EmuJ_000421050	BTB:POZ domain containing protein 9	142	-19.05	2	11	457	478	9	88.89%
emu-miR-10-5p	EmuJ_000448200	Phd finger protein 10	155	-18.58	2	17	343	365	16	81.25%
emu-miR-10-5p	EmuJ_001020600	Histone H4 acetyltransferase NuA4 complex Eaf6	159	-18.84	2	20	623	644	18	72.22%
emu-miR-10-5p	EmuJ_000517300	n/a	149	-23.35	2	21	198	223	23	65.22%
emu-miR-10-5p	EmuJ_001148900	Expressed protein	147	-17.04	2	20	708	729	18	66.67%
emu-miR-10-5p	EmuJ_001095100	Homeobox protein Meis1	153	-22.45	2	18	47	66	16	81.25%
emu-miR-10-5p	EmuJ_000753900	Major facilitator superfamily domain containing protein	165	-26.88	2	19	43	65	18	83.33%
emu-miR-10-5p	EmuJ_000188500	Protein pangolin J	158	-24.27	2	21	149	169	19	73.68%
emu-miR-10-5p	EmuJ_000839400	Malonyl coenzyme A acyl carrier protein transacylase	149	-18.19	2	20	83	109	23	65.22%
emu-miR-1-3p	EmuJ_001113100	Expressed protein	153	-18.65	2	19	1	21	18	66.67%
emu-miR-1-3p	EmuJ_001151600	KRAB A domain containing protein	154	-17.24	2	17	518	536	15	80.00%
emu-miR-1-3p	EmuJ_000007500	Dynamin associated protein	164	-19.36	2	18	31	54	20	80.00%
emu-miR-1-3p	EmuJ_000798500	Alpha 16 mannosyl glycoprotein	156	-19.66	2	19	80	101	19	73.68%
emu-miR-1-3p	EmuJ_000485800	Antigen II/3; Ezrin-like protein; H17g protein tegumental antigen; Tegument protein	162	-20.69	2	19	88	107	17	70.59%
emu-miR-1-3p	EmuJ_000484900	TATA element modulatory factor	162	-20.67	2	16	62	83	16	87.50%
emu-miR-1-3p	EmuJ_000978100	39S ribosomal protein L16 mitochondrial	156	-19.56	2	13	144	163	11	90.91%
emu-miR-1-3p	EmuJ_000901700	Wd40 repeat	146	-17.75	2	11	205	224	9	88.89%
emu-miR-1-3p	EmuJ_001145000	V type proton ATPase 21 kDa proteolipid subunit	160	-18.33	2	19	114	132	17	82.35%
emu-miR-1-3p	EmuJ_001049900	Dynein light chain	152	-19.47	2	18	2	22	17	70.59%
emu-miR-1-3p	EmuJ_000493000	RhoGEF domain containing protein	159	-18.15	2	16	808	827	14	78.57%
emu-miR-1-3p	EmuJ_000301200	Exocyst complex component	167	-21.39	2	17	6	26	16	87.50%
emu-miR-1-3p	EmuJ_001122800	Tektin 3	165	-17.69	2	18	711	730	16	81.25%
emu-miR-1-3p	EmuJ_000768200	Wd40 repeat	158	-19.17	2	19	96	115	17	64.71%
emu-miR-1-3p	EmuJ_000316600	Irregular chiasm C roughest protein	161	-17.05	2	19	526	546	18	77.78%
emu-miR-1-3p	EmuJ_000193700	Annexin	158	-17.71	2	15	8	27	13	84.62%
emu-miR-1-3p	EmuJ_001088200	n/a	156	-17.15	2	17	1	19	15	73.33%
emu-miR-1-3p	EmuJ_000333000	Brain tumor protein	150	-18.41	2	19	576	595	17	64.71%
emu-miR-1-3p	EmuJ_000318500	SH3-binding, glutamic acid-rich protein	163	-20.48	2	19	67	87	19	84.21%
emu-miR-1-3p	EmuJ_001159000	n/a	160	-18.8	2	18	20	42	19	73.68%
emu-miR-1-3p	EmuJ_000923300	Transmembrane protein 181	161	-17.8	2	19	72	92	18	77.78%
emu-miR-1-3p	EmuJ_000596700	Dynein heavy chain	158	-22.51	2	19	370	389	17	70.59%
emu-miR-1-3p	EmuJ_000321000	Protein boule	164	-21.65	2	19	50	68	17	82.35%
emu-miR-1-3p	EmuJ_000178100	Activin; Tgf beta family	160	-18	2	19	368	386	17	82.35%
emu-miR-9-5p	EmuJ_000943200	n/a	175	-26.48	2	22	405	426	20	75.00%
emu-miR-9-5p	EmuJ_001059500	Serine:threonine:tyrosine interacting	164	-23.34	2	22	175	198	21	76.19%
emu-miR-9-5p	EmuJ_000638900	Nucleoside diphosphate kinase 5	168	-22.86	2	22	213	237	22	72.73%
emu-miR-9-5p	EmuJ_000853100	ATP dependent RNA helicase DDX27	154	-21.97	2	20	707	730	19	63.16%
emu-miR-9-5p	EmuJ_000961100	Slit 2 protein	164	-21.52	2	22	330	353	21	71.43%
emu-miR-9-5p	EmuJ_000689700	Spectrin alpha actinin	162	-21.1	2	21	48	69	19	73.68%
emu-miR-9-5p	EmuJ_000103500	Transmembrane protein 188	161	-20.37	2	20	444	465	18	77.78%
emu-miR-9-5p	EmuJ_000103000	Transmembrane protein 188	161	-20.37	2	20	445	466	18	77.78%
emu-miR-9-5p	EmuJ_000955500	Peregrin	164	-20.28	2	22	102	126	22	72.73%
emu-miR-9-5p	EmuJ_000109000	Expressed protein	159	-20.14	2	22	1	26	25	64.00%
emu-miR-9-5p	EmuJ_000775300	n/a	160	-19.49	2	22	114	138	22	68.18%
emu-miR-9-5p	EmuJ_001169000	Expressed conserved protein	157	-19.23	2	22	69	91	20	65.00%
emu-miR-9-5p	EmuJ_000495300	Expressed protein	160	-19.02	2	18	609	632	17	76.47%
emu-miR-9-5p	EmuJ_000114000	Adenylate kinase	154	-18.9	2	21	64	88	21	71.43%
emu-miR-9-5p	EmuJ_000391400	Transposase	151	-18.56	2	19	526	546	17	70.59%
emu-miR-9-5p	EmuJ_000812600	n/a	162	-18.53	2	20	148	171	19	73.68%
emu-miR-9-5p	EmuJ_000108300	Carbonic anhydrase	156	-18.52	2	22	159	183	22	63.64%
emu-miR-9-5p	EmuJ_000843000	Centrin 2	153	-18.41	2	22	14	36	20	65.00%
emu-miR-9-5p	EmuJ_001123000	n/a	158	-18.23	2	20	373	396	19	63.16%
emu-miR-9-5p	EmuJ_001082900	Selenide, water dikinase	153	-18.12	2	22	96	118	20	60.00%
emu-miR-9-5p	EmuJ_000209900	Signal recognition particle subunit SRP72	152	-17.83	2	22	135	158	21	66.67%
emu-miR-9-5p	EmuJ_000927600	n/a	146	-17.58	2	21	173	192	19	73.68%
emu-miR-9-5p	EmuJ_000824300	Enhancer of polycomb-like protein	157	-17.53	2	22	156	178	22	68.18%
emu-miR-9-5p	EmuJ_000954400	n/a	146	-17.45	2	21	74	99	22	68.18%
emu-miR-9-5p	EmuJ_000478200	Signal recognition particle 9 kDa protein	154	-17.43	2	22	160	186	24	66.67%
emu-miR-9-5p	EmuJ_001169900	Annexin	153	-17.39	2	22	73	94	21	66.67%
emu-miR-9-5p	EmuJ_000432500	WD repeat containing protein 4	150	-17.27	2	22	347	370	22	68.18%
emu-miR-9-5p	EmuJ_001118600	Mitochondrial distribution morphology family 35 apoptosis	149	-17.26	2	22	665	687	20	60.00%
emu-miR-9-5p	EmuJ_000768900	Glycosyl transferase family 8	151	-17.18	2	21	140	165	22	63.64%
emu-miR-9-5p	EmuJ_000921100	n/a	161	-17.06	2	22	836	858	20	70.00%
emu-miR-4989-3p	EmuJ_000221700	FeS cluster biolocus tagsis	158	-18.51	2	21	274	294	19	73.68%
emu-miR-4989-3p	EmuJ_001177300	Basic leucine zipper bZIP transcription factor	166	-18.64	2	20	44	66	19	78.95%
emu-miR-4989-3p	EmuJ_000185100	Expressed conserved protein	171	-18.97	2	21	49	71	20	80.00%
emu-miR-4989-3p	EmuJ_000522200	Ras C3 botulinum toxin substrate 1	164	-17.54	2	21	185	206	19	73.68%
emu-miR-4989-3p	EmuJ_000728300	Melanoma inhibitory activity protein 3	160	-17.29	2	20	29	50	19	78.95%
emu-miR-4989-3p	EmuJ_000495100	General transcription factor IIH subunit	154	-19.55	2	21	5	29	22	68.18%
emu-miR-4989-3p	EmuJ_000231100	Innexin	156	-18.47	2	21	946	964	19	73.68%
emu-miR-4989-3p	EmuJ_000631800	Serine rich repeat protein	166	-20.93	2	20	370	394	21	76.19%
emu-miR-4989-3p	EmuJ_000189200	PH and SEC7 domain containing protein 3	175	-25.57	2	21	214	237	21	80.95%
emu-miR-4989-3p	EmuJ_000943500	Zinc finger protein	156	-17.04	2	20	131	155	21	76.19%
emu-miR-4989-3p	EmuJ_000914100	Cationic amino acid transporter	166	-20.92	2	16	173	195	15	93.33%
emu-miR-71-5p	EmuJ_000916800	Transmembrane protein 131	160	-18.83	2	19	1	18	17	76.47%
emu-miR-71-5p	EmuJ_000784300	RUN domain containing protein 3A	152	-19.47	2	18	1	19	18	66.67%
emu-miR-71-5p	EmuJ_000118500	Cyclin y	158	-22.79	2	19	1	17	17	82.35%
emu-miR-71-5p	EmuJ_000517600	Golgin subfamily A	154	-17.59	2	15	1	14	13	76.92%
emu-miR-71-5p	EmuJ_000711900	Rho GTPase activating protein 21	153	-19.45	2	19	1	23	20	70.00%
emu-miR-71-5p	EmuJ_000806500	UBX domain containing protein 1	160	-21.02	2	20	3	23	19	78.95%
emu-miR-71-5p	EmuJ_001186800	Gpi ethanolamine phosphate transferase 3	157	-21.15	2	20	4	23	18	72.22%
emu-miR-71-5p	EmuJ_001059700	Aurora kinase A	154	-22.31	2	20	4	25	19	73.68%
emu-miR-71-5p	EmuJ_001200800	Vam6:Vps39 protein	157	-19.23	2	16	4	23	14	85.71%
emu-miR-71-5p	EmuJ_001141100	Regulatory associated protein of mTOR	155	-18.66	2	12	6	26	10	100.00%
emu-miR-71-5p	EmuJ_000478300	High density lipoprotein receptor hdl	157	-18.55	2	19	6	27	18	66.67%
emu-miR-71-5p	EmuJ_001003500	n/a	157	-24.51	2	19	7	31	21	71.43%
emu-miR-71-5p	EmuJ_000475200	Prolactin regulatory element binding protein	152	-17.29	2	14	7	28	13	84.62%
emu-miR-71-5p	EmuJ_000468300	Target of rapamycin complex 2 subunit MAPKAP1	155	-18.02	2	20	9	27	18	77.78%
emu-miR-71-5p	EmuJ_000056650	EGF region	152	-18.12	2	19	9	28	17	58.82%
emu-miR-71-5p	EmuJ_000303400	WD repeat containing protein 20	158	-17.2	2	19	10	30	17	64.71%
emu-miR-71-5p	EmuJ_000969800	Alpha 13 mannosyl glycoprotein	153	-19.42	2	19	11	33	19	57.89%
emu-miR-71-5p	EmuJ_000972400	Leukotriene A 4 hydrolase	160	-19.26	2	19	12	34	19	78.95%
emu-miR-71-5p	EmuJ_000610700	PAB dependent polyA specific ribonuclease	150	-17.53	2	16	12	33	15	73.33%
emu-miR-71-5p	EmuJ_000947300	Phosphatidylinositol 4 kinase type 2 beta	154	-19.3	2	19	13	31	17	76.47%
emu-miR-71-5p	EmuJ_001005700	n/a	149	-17.11	2	19	14	36	19	68.42%
emu-miR-71-5p	EmuJ_000951700	Golgi SNAP receptor complex	166	-23.77	2	20	14	36	20	75.00%
emu-miR-71-5p	EmuJ_001126800	Serine threonine protein kinase	156	-19.01	2	15	14	33	13	92.31%
emu-miR-71-5p	EmuJ_000322700	Leucine rich repeat protein 1	156	-19.36	2	19	14	33	17	64.71%
emu-miR-71-5p	EmuJ_000738800	Expressed conserved protein	153	-18.37	2	19	14	35	18	66.67%
emu-miR-71-5p	EmuJ_000193300	NAD kinase	164	-20.84	2	18	14	36	18	77.78%
emu-miR-71-5p	EmuJ_001068400	Zinc finger RING type	145	-17.78	2	14	14	34	12	75.00%
emu-miR-71-5p	EmuJ_000425300	Rho GTPase activating protein 1	150	-17.08	2	17	14	33	15	73.33%
emu-miR-71-5p	EmuJ_000813100	Calcium dependent secretion activator 1	149	-17.36	2	19	14	31	17	76.47%
emu-miR-71-5p	EmuJ_000121600	DnaJ Hsp40 subfamily C member	154	-17.17	2	17	15	34	15	80.00%
emu-miR-71-5p	EmuJ_000191100	Transcription factor SOX 14	155	-17.96	2	20	15	35	18	61.11%
emu-miR-71-5p	EmuJ_001017500	Zinc finger protein	151	-21.64	2	19	15	35	18	77.78%
emu-miR-71-5p	EmuJ_000323400	Leucine rich repeat protein 1	156	-19.36	2	19	15	34	17	64.71%
emu-miR-71-5p	EmuJ_000770600	Protein phosphatase 2C	149	-19.21	2	20	15	37	20	60.00%
emu-miR-71-5p	EmuJ_000903700	Programmed cell death protein 2	147	-18.48	2	19	16	36	18	72.22%
emu-miR-71-5p	EmuJ_001067600	Zinc finger protein	156	-18.05	2	19	16	38	19	68.42%
emu-miR-71-5p	EmuJ_001179600	Protein FAM160A1	171	-23.16	2	20	16	36	18	72.22%
emu-miR-71-5p	EmuJ_000440000	T-cell immunomodulatory protein	151	-17.37	2	19	17	35	17	70.59%
emu-miR-71-5p	EmuJ_000109300	Son of sevenless 1	152	-19.89	2	20	18	39	20	75.00%
emu-miR-71-5p	EmuJ_000083600	Sterile alpha motif SAM	154	-19.93	2	18	19	41	19	78.95%
emu-miR-71-5p	EmuJ_000827550	Glycolipid transfer protein	155	-20.75	2	20	20	40	18	66.67%
emu-miR-71-5p	EmuJ_000602300	Rab GTPase binding effector protein 1	150	-17.51	2	19	20	40	17	58.82%
emu-miR-71-5p	EmuJ_000574200	Protein Smaug 1	153	-18.78	2	20	20	39	18	72.22%
emu-miR-71-5p	EmuJ_000843200	DEAD box ATP dependent RNA helicase	153	-19.04	2	19	21	38	17	82.35%
emu-miR-71-5p	EmuJ_000640100	Eukaryotic release factor 3 erfs	150	-23.17	2	20	21	42	19	63.16%
emu-miR-71-5p	EmuJ_000523700	ATP binding cassette sub family F	144	-17.84	2	14	21	42	13	76.92%
emu-miR-71-5p	EmuJ_000966000	Proteasome inhibitor	154	-18.13	2	20	21	42	19	73.68%
emu-miR-71-5p	EmuJ_001130200	Pre mRNA splicing factor syf2	163	-20.8	2	20	21	41	18	77.78%
emu-miR-71-5p	EmuJ_000390600	Zinc finger C2H2 type	153	-17.54	2	19	21	43	19	68.42%
emu-miR-71-5p	EmuJ_000100000	Protein RER1	153	-17.77	2	20	22	44	20	70.00%
emu-miR-71-5p	EmuJ_000905200	Methionine synthase reductasa	153	-17.77	2	20	22	41	18	66.67%
emu-miR-71-5p	EmuJ_000825650	Zinc finger C2H2 type	153	-22.75	2	19	22	46	21	66.67%
emu-miR-71-5p	EmuJ_000850000	CREB binding protein	151	-17.21	2	17	23	44	16	75.00%
emu-miR-71-5p	EmuJ_000163700	Rossmann alpha beta alpha sandwich fold	170	-24.13	2	19	23	43	17	76.47%
emu-miR-71-5p	EmuJ_000646000	Mitotic checkpoint serine:threonine protein	152	-17.46	2	20	25	45	19	73.68%
emu-miR-71-5p	EmuJ_000094900	Low density lipoprotein receptor protein	158	-20.45	2	20	25	46	19	68.42%
emu-miR-71-5p	EmuJ_000325100	Tubulin specific chaperone E	146	-17.47	2	17	26	45	15	73.33%
emu-miR-71-5p	EmuJ_000085500	Expressed conserved protein	162	-26.61	2	20	26	49	21	76.19%
emu-miR-71-5p	EmuJ_001000850	n/a	151	-19.36	2	14	26	45	12	91.67%
emu-miR-71-5p	EmuJ_000728400	n/a	159	-21.61	2	20	27	47	18	72.22%
emu-miR-71-5p	EmuJ_000445850	Mitochondrial import inner membrane translocase subunit Tim23 putative	162	-22.67	2	20	27	48	19	73.68%
emu-miR-71-5p	EmuJ_000228700	Leucine rich repeat typical subtype	156	-20.33	2	20	27	47	19	73.68%
emu-miR-71-5p	EmuJ_000124300	CTR1 high affinity copper uptake protein 1	164	-24.91	2	20	27	47	19	84.21%
emu-miR-71-5p	EmuJ_000140600	Hypothetical transcript	166	-19.07	2	20	27	49	20	75.00%
emu-miR-71-5p	EmuJ_000555800	Tfiia large subunit	145	-17.27	2	10	30	50	8	100.00%
emu-miR-71-5p	EmuJ_000223100	Deoxynucleotidyltransferase terminal interacting	154	-20.02	2	15	30	50	13	76.92%
emu-miR-71-5p	EmuJ_001054300	TBC1 domain family 2B	167	-21.01	2	20	30	50	18	77.78%
emu-miR-71-5p	EmuJ_000484900	TATA element modulatory factor	158	-19.68	2	20	31	54	21	71.43%
emu-miR-71-5p	EmuJ_000113400	Clathrin interactor 1	157	-21.62	2	20	31	54	21	66.67%
emu-miR-71-5p	EmuJ_000807400	alpha-1,2-Mannosidase	159	-21.04	2	18	32	51	16	81.25%
emu-miR-71-5p	EmuJ_000568300	F box only protein	159	-23.48	2	19	33	53	18	77.78%
emu-miR-71-5p	EmuJ_000912200	Phosphoglycerate mutase	153	-18.92	2	15	34	55	14	85.71%
emu-miR-71-5p	EmuJ_001102400	Mitogen-activated protein kinase kinase kinase kinase	155	-22.86	2	20	36	57	20	80.00%
emu-miR-71-5p	EmuJ_001055600	Cell adhesion molecule	152	-19.17	2	19	37	60	20	70.00%
emu-miR-71-5p	EmuJ_000434400	Merlin:moesin:ezrin:radixin	156	-18	2	20	41	59	18	77.78%
emu-miR-71-5p	EmuJ_000086800	Syntaxin 5	149	-19.81	2	17	41	59	15	73.33%
emu-miR-71-5p	EmuJ_000174700	Chromobox protein 2	153	-19.12	2	20	42	61	18	72.22%
emu-miR-71-5p	EmuJ_000359860	Expressed protein	146	-17.69	2	20	42	64	20	65.00%
emu-miR-71-5p	EmuJ_000568800	Asparagine rich protein	160	-20.33	2	19	43	62	17	82.35%
emu-miR-71-5p	EmuJ_000889100	n/a	156	-17.71	2	20	44	64	19	73.68%
emu-miR-71-5p	EmuJ_000473500	n/a	167	-19.34	2	20	44	64	18	72.22%
emu-miR-71-5p	EmuJ_000481700	Multiple pdz domain protein	152	-22.04	2	17	44	64	15	73.33%
emu-miR-71-5p	EmuJ_000570900	n/a	159	-17.95	2	20	45	65	18	66.67%
emu-miR-71-5p	EmuJ_000483300	RPEL repeat	156	-20.75	2	18	45	66	17	70.59%
emu-miR-71-5p	EmuJ_001004200	BCL2 associated athanolocus tag 3	152	-18.82	2	18	48	70	18	72.22%
emu-miR-71-5p	EmuJ_001042400	Polypeptide N-acetylgalactosaminyltransferase	153	-17.16	2	19	49	70	18	72.22%
emu-miR-71-5p	EmuJ_001087800	Protein CHMP7	153	-22.83	2	19	49	74	22	68.18%
emu-miR-71-5p	EmuJ_000761600	WD repeat protein	152	-17.26	2	19	50	69	17	70.59%
emu-miR-71-5p	EmuJ_000773100	SH2	159	-20.35	2	20	50	70	18	72.22%
emu-miR-71-5p	EmuJ_000935200	Synaptic vesicle membrane protein VAT 1	163	-21.97	2	20	52	72	18	66.67%
emu-miR-71-5p	EmuJ_000993500	RWD domain containing protein 1	152	-17.74	2	19	52	74	19	68.42%
emu-miR-71-5p	EmuJ_000589400	SAGA-associated factor 11	164	-21.83	2	17	55	75	15	80.00%
emu-miR-71-5p	EmuJ_001100800	Expressed conserved protein	157	-20.53	2	19	56	80	21	66.67%
emu-miR-71-5p	EmuJ_000473600	Sodium dependent phosphate transport protein 1	161	-21.51	2	20	57	76	18	72.22%
emu-miR-71-5p	EmuJ_000904600	Cut homeobox 1b	153	-21.7	2	20	57	76	18	72.22%
emu-miR-71-5p	EmuJ_000690800	Secretion regulating guanine nucleotide exchange	159	-18.27	2	20	58	77	19	78.95%
emu-miR-71-5p	EmuJ_000690200	Secretion regulating guanine nucleotide exchange	159	-18.27	2	20	59	78	19	78.95%
emu-miR-71-5p	EmuJ_000456500	G1:S specific cyclin D1	155	-20.16	2	19	62	82	18	77.78%
emu-miR-71-5p	EmuJ_000491800	Mitochondrial intermediate peptidase	162	-19.32	2	19	62	82	17	76.47%
emu-miR-71-5p	EmuJ_000123600	Dual specificity mitogen activated protein	160	-21.81	2	13	70	90	11	100.00%
emu-miR-71-5p	EmuJ_000672150	Protein FAM135A	161	-22.84	2	18	72	92	16	68.75%
emu-miR-71-5p	EmuJ_001182800	Rho associated protein kinase	154	-17.32	2	20	74	95	19	68.42%
emu-miR-71-5p	EmuJ_000531650	n/a	155	-19.48	2	12	75	95	10	100.00%
emu-miR-71-5p	EmuJ_000097300	Hypothetical transcript	150	-17.38	2	20	75	97	20	60.00%
emu-miR-71-5p	EmuJ_001114300	Expressed conserved protein	155	-20.61	2	20	75	95	18	66.67%
emu-miR-71-5p	EmuJ_000962500	Protein phosphatase 1 regulatory subunit 3B	153	-21.26	2	19	75	97	19	68.42%
emu-miR-71-5p	EmuJ_000602900	Zinc finger C2H2 type	157	-18.37	2	19	76	97	18	77.78%
emu-miR-71-5p	EmuJ_000065000	Glucosamine 6-phosphate N-acetyltransferase	156	-20.24	2	19	77	96	17	70.59%
emu-miR-71-5p	EmuJ_000725500	Phosphoinositide 3 kinase regulatory subunit 4	146	-17.9	2	20	82	103	19	63.16%
emu-miR-71-5p	EmuJ_000866400	Polycomb group RING finger protein 2	162	-20.51	2	19	87	107	17	70.59%
emu-miR-71-5p	EmuJ_000135300	Rabenosyn 5	154	-18.59	2	20	87	108	19	68.42%
emu-miR-71-5p	EmuJ_000430800	Ras protein Rab 2A	161	-22.64	2	20	89	108	18	72.22%
emu-miR-71-5p	EmuJ_001038000	Myosin XV	158	-18.09	2	18	89	107	16	81.25%
emu-miR-71-5p	EmuJ_001094200	Phosphatidylinositol 4 phosphate 3 kinase C2	156	-18.51	2	19	90	112	19	73.68%
emu-miR-71-5p	EmuJ_000466500	n/a	152	-19.53	2	20	94	114	19	63.16%
emu-miR-71-5p	EmuJ_000915600	Ubiquitin carboxyl terminal hydrolase 12	157	-21.54	2	19	95	116	18	72.22%
emu-miR-71-5p	EmuJ_001119000	HEAT repeat containing protein 2	159	-18.42	2	20	101	121	18	61.11%
emu-miR-71-5p	EmuJ_001127500	Sodium bile acid cotransporter	151	-17.57	2	19	108	126	17	76.47%
emu-miR-71-5p	EmuJ_001144700	Ras protein Rab 39B	150	-18.43	2	20	108	129	19	63.16%
emu-miR-71-5p	EmuJ_000714900	Zinc finger C2H2 type	148	-17.8	2	19	123	142	17	64.71%
emu-miR-71-5p	EmuJ_000437700	Expressed conserved protein	157	-18.74	2	20	126	145	18	66.67%
emu-miR-71-5p	EmuJ_000278400	Follistatin	165	-20.97	2	20	131	153	20	75.00%
emu-miR-71-5p	EmuJ_000105000	Histone-lysine N-methyltransferase	158	-19.31	2	20	138	159	19	73.68%
emu-miR-71-5p	EmuJ_001046000	Carboxy terminal domain RNA polymerase II	150	-19.65	2	20	138	161	21	61.90%
emu-miR-71-5p	EmuJ_000981100	Transcription elongation factor b polypeptide 3	147	-18.78	2	20	141	159	18	66.67%
emu-miR-71-5p	EmuJ_001187400	CCR4 NOT transcription complex subunit 7 linea germinal	151	-18.9	2	20	156	175	19	73.68%
emu-miR-71-5p	EmuJ_000294600	Dual specificity tyrosine-phosphorylation-regulated kinase 1a	161	-18.36	2	19	157	179	19	78.95%
emu-miR-71-5p	EmuJ_000458800	Vasodilator stimulated phosphoprotein	154	-21.8	2	19	158	177	18	77.78%
emu-miR-71-5p	EmuJ_000832900	Subfamily M12B unassigned peptidase	160	-18.26	2	19	168	187	17	76.47%
emu-miR-71-5p	EmuJ_000085700	Frizzled 10	165	-23.33	2	19	170	191	18	77.78%
emu-miR-71-5p	EmuJ_001174700	Charged multivesicular body protein 2b	160	-20.85	2	20	171	189	18	77.78%
emu-miR-71-5p	EmuJ_000339900	Tubulin alpha	149	-18.1	2	19	183	204	18	61.11%
emu-miR-71-5p	EmuJ_001045000	n/a	153	-27.56	2	20	189	215	24	70.83%
emu-miR-71-5p	EmuJ_000203600	Calcium binding protein 39 linea germinal	157	-17.43	2	20	194	213	18	72.22%
emu-miR-71-5p	EmuJ_000234100	Nuclear hormone receptor family member nhr 41	154	-17.63	2	19	207	227	17	64.71%
emu-miR-71-5p	EmuJ_000357200	Peptidase M neutral zinc metallopeptidases zinc binding site	141	-18.89	2	20	211	226	18	66.67%
emu-miR-71-5p	EmuJ_000006800	Fatty acid desaturase type 1	141	-19.29	2	20	211	227	18	66.67%
emu-miR-71-5p	EmuJ_000783500	Expressed protein	157	-23.24	2	20	226	245	18	72.22%
emu-miR-71-5p	EmuJ_000331400	Scaffold protein salvador	164	-17.82	2	18	227	248	17	82.35%
emu-miR-71-5p	EmuJ_000306400	Poly adp ribose polymerase	149	-18.47	2	19	233	255	19	63.16%
emu-miR-71-5p	EmuJ_001068600	Serine:threonine protein kinase	150	-19.3	2	11	241	261	9	100.00%
emu-miR-71-5p	EmuJ_001049400	Protein serac1	151	-17.09	2	19	256	274	17	70.59%
emu-miR-71-5p	EmuJ_000908300	Cyclic AMP responsive element binding protein	161	-19.5	2	19	264	285	18	77.78%
emu-miR-71-5p	EmuJ_000955000	Protein CIP2A	158	-22.07	2	20	270	291	19	73.68%
emu-miR-71-5p	EmuJ_000778300	Protein kinase C	157	-17.37	2	20	296	315	18	72.22%
emu-miR-71-5p	EmuJ_001015050	CTD small phosphatase protein like	150	-19.41	2	20	297	319	20	60.00%
emu-miR-71-5p	EmuJ_000601200	Serine/threonine-protein phosphatase	154	-17.04	2	19	310	330	17	64.71%
emu-miR-71-5p	EmuJ_000531500	Phospholipid-transporting ATPase	154	-18.48	2	20	320	341	19	68.42%
emu-miR-71-5p	EmuJ_000716900	Dual specificity	153	-17.35	2	20	321	340	18	72.22%
emu-miR-71-5p	EmuJ_000957200	Rho guanine nucleotide exchange factor 12	151	-17.74	2	18	329	353	20	70.00%
emu-miR-71-5p	EmuJ_000778300	Protein kinase C	150	-18.03	2	19	329	348	18	72.22%
emu-miR-71-5p	EmuJ_000675500	Zinc finger protein	152	-19.64	2	13	346	366	11	81.82%
emu-miR-71-5p	EmuJ_000581400	Tau tubulin kinase 1	154	-20.65	2	20	386	407	19	73.68%
emu-miR-71-5p	EmuJ_000073600	Expressed protein	156	-18.07	2	20	390	410	19	78.95%
emu-miR-71-5p	EmuJ_000965700	Cytochrome c heme lyase	147	-19.12	2	20	392	412	18	61.11%
emu-miR-71-5p	EmuJ_000627600	Tumor suppressor p53 binding protein 1	154	-17.27	2	20	394	415	19	63.16%
emu-miR-71-5p	EmuJ_000104800	Protein sel 1 1	149	-18.38	2	20	394	413	18	66.67%
emu-miR-71-5p	EmuJ_000496100	n/a	158	-27.24	2	20	396	419	21	71.43%
emu-miR-71-5p	EmuJ_000974400	Cyclin G2	156	-17.24	2	20	421	439	18	72.22%
emu-miR-71-5p	EmuJ_000099900	Histone RNA hairpin binding protein	151	-18.99	2	20	461	479	18	72.22%
emu-miR-71-5p	EmuJ_001189300	Tetraspanin	158	-19.63	2	15	488	508	13	84.62%
emu-miR-71-5p	EmuJ_000242000	ATPase family AAA domain containing protein	157	-18.04	2	20	540	562	20	70.00%
emu-miR-71-5p	EmuJ_000848100	RNA polymerase II elongation factor ELL	165	-24.14	2	20	612	635	21	76.19%
emu-miR-71-5p	EmuJ_000967400	Mxi neural development protein	149	-18.05	2	18	620	638	16	75.00%
emu-miR-71-5p	EmuJ_000628300	Innexin	174	-25.25	2	20	710	731	19	78.95%
emu-miR-71-5p	EmuJ_001094800	MACRO domain containing protein 2	149	-20.7	2	19	728	750	19	68.42%
emu-miR-71-5p	EmuJ_000920000	Cell wall protein awa1p	149	-17.87	2	19	736	758	19	57.89%
emu-miR-71-5p	EmuJ_000461800	Prolyl tRNA synthetase mitochondrial	153	-20.26	2	19	805	826	18	66.67%
emu-miR-71-5p	EmuJ_000479600	Importin subunit alpha	166	-17.92	2	19	808	828	17	82.35%
emu-let-7-5p	EmuJ_000044900	Clathrin coat assembly protein ap 1	150	-17.06	2	11	8	29	9	100.00%
emu-let-7-5p	EmuJ_000046700	Expressed protein	151	-18.57	2	14	607	627	12	91.67%
emu-let-7-5p	EmuJ_000078200	Kelch repeat type 1	153	-19.37	2	14	301	322	12	83.33%
emu-let-7-5p	EmuJ_000078500	Kelch ECH associated protein 1	151	-21.53	2	21	328	350	20	65.00%
emu-let-7-5p	EmuJ_000083400	Dpy 30 motif	154	-24.05	2	16	368	391	16	75.00%
emu-let-7-5p	EmuJ_000099900	Histone RNA hairpin binding protein (tiene sitio para miR-71 tb)	158	-20.37	2	21	631	651	19	73.68%
emu-let-7-5p	EmuJ_000130400	GA repeat binding protein beta 2	146	-19.11	2	21	92	119	25	64.00%
emu-let-7-5p	EmuJ_000181600	CUE domain containing protein 2 B	152	-17.45	2	18	2	24	17	64.71%
emu-let-7-5p	EmuJ_000189200	PH and SEC7 domain containing protein 3	156	-21.85	2	20	72	93	19	78.95%
emu-let-7-5p	EmuJ_000197100	Proto oncolocus tag serine:threonine protein kinase	163	-20.38	2	20	82	103	18	72.22%
emu-let-7-5p	EmuJ_000257100	Nitrogen permease regulator 3 protein	150	-17.78	2	11	523	544	9	100.00%
emu-let-7-5p	EmuJ_000283800	ABC domain containing protein kinase	150	-18.92	2	11	42	63	9	100.00%
emu-let-7-5p	EmuJ_000342000	Tyrosine-protein kinase	148	-17.15	2	20	55	74	18	61.11%
emu-let-7-5p	EmuJ_000345200	Zinc finger rna binding protein	156	-17.91	2	17	1	19	15	73.33%
emu-let-7-5p	EmuJ_000379600	Nuclear receptor 2DBD gamma	159	-21.9	2	21	173	195	20	70.00%
emu-let-7-5p	EmuJ_000393200	BRCA1 associated protein	153	-20.24	2	20	625	652	24	66.67%
emu-let-7-5p	EmuJ_000421050	BTB:POZ domain containing protein 9	155	-21.3	2	16	562	583	14	78.57%
emu-let-7-5p	EmuJ_000441300	Vacuolar-sorting protein SNF8	148	-18.59	2	21	53	74	19	63.16%
emu-let-7-5p	EmuJ_000455800	n/a	143	-17.54	2	12	840	861	10	80.00%
emu-let-7-5p	EmuJ_000474400	Immunogenic protein	157	-19.22	2	18	179	200	16	75.00%
emu-let-7-5p	EmuJ_000482600	MutS protein 5	151	-18.97	2	21	553	577	22	68.18%
emu-let-7-5p	EmuJ_000492200	Uroporphyrinogen decarboxylase	176	-24.87	2	19	384	404	17	94.12%
emu-let-7-5p	EmuJ_000503220	Protein kinase	151	-17.94	2	21	26	49	21	61.90%
emu-let-7-5p	EmuJ_000517300	n/a	142	-21.42	2	11	305	326	9	88.89%
emu-let-7-5p	EmuJ_000588700	Protein furry	162	-26.01	2	21	29	54	23	73.91%
emu-let-7-5p	EmuJ_000621000	Dynein heavy chain	164	-17.33	2	21	564	585	19	73.68%
emu-let-7-5p	EmuJ_000634200	Pro neuregulin 2 membrane bound	152	-21.17	2	14	3	25	13	84.62%
emu-let-7-5p	EmuJ_000707800	Expressed conserved protein	156	-19.14	2	13	71	92	11	90.91%
emu-let-7-5p	EmuJ_000714500	Co chaperone HscB	164	-19.05	2	21	650	671	19	73.68%
emu-let-7-5p	EmuJ_000739300	Protein vprbp	161	-20.98	2	18	102	123	16	75.00%
emu-let-7-5p	EmuJ_000744800	Daz associated protein 1	161	-21.93	2	20	619	643	21	71.43%
emu-let-7-5p	EmuJ_000755900	N acetyltransferase ESCO1	146	-22.28	2	11	1	20	9	88.89%
emu-let-7-5p	EmuJ_000760200	Heterolocus tagous nuclear ribonucleoprotein	147	-20.26	2	20	28	46	18	72.22%
emu-let-7-5p	EmuJ_000769500	Discoidin domain containing receptor 2	154	-18.44	2	19	280	301	17	64.71%
emu-let-7-5p	EmuJ_000796900	Short coiled coil protein	154	-18.13	2	20	163	185	19	68.42%
emu-let-7-5p	EmuJ_000808500	Expressed protein	163	-21.55	2	16	6	27	14	85.71%
emu-let-7-5p	EmuJ_000808600	Homeobox	156	-22.03	2	21	200	218	19	68.42%
emu-let-7-5p	EmuJ_000808600	Homeobox	163	-21.55	2	16	237	258	14	85.71%
emu-let-7-5p	EmuJ_000813900	Homeobox protein Hox B4a	146	-19.3	2	11	168	189	9	88.89%
emu-let-7-5p	EmuJ_000826400.	Synaptobrevin YKT6	166	-19.78	2	21	39	59	19	78.95%
emu-let-7-5p	EmuJ_000826900	Alpha 16 fucosyltransferase	158	-18.08	2	21	191	214	21	71.43%
emu-let-7-5p	EmuJ_000908800	Transient receptor potential gamma protein	166	-18.04	2	20	315	337	19	78.95%
emu-let-7-5p	EmuJ_000916100	Synaptotagmin	147	-18.26	2	20	61	80	18	72.22%
emu-let-7-5p	EmuJ_000921100	n/a	160	-20.28	2	17	228	249	15	80.00%
emu-let-7-5p	EmuJ_000935200	Synaptic vesicle membrane protein VAT 1	143	-17.66	2	20	281	300	18	66.67%
emu-let-7-5p	EmuJ_000939100	Matrix metallopeptidase 7 M10 family	159	-17.49	2	21	83	105	20	70.00%
emu-let-7-5p	EmuJ_000998600	Protein ACN9 mitochondrial	146	-17.45	2	20	106	128	19	68.42%
emu-let-7-5p	EmuJ_001020900	Dihydropyrimidinase protein 4	145	-19.41	2	21	355	374	19	63.16%
emu-let-7-5p	EmuJ_001026900	Expressed conserved protein	152	-19.48	2	21	136	157	19	63.16%
emu-let-7-5p	EmuJ_001048100	Zinc transporter foi	164	-17.2	2	21	83	104	19	73.68%
emu-let-7-5p	EmuJ_001050600	Mitochondrial inner membrane protease subunit	140	-18	2	9	136	157	7	100.00%
emu-let-7-5p	EmuJ_001053100	Transcription factor sum	148	-19.69	2	21	78	99	19	63.16%
emu-let-7-5p	EmuJ_001088400	Acetyl coenzyme A hydrolase transferase	150	-20.23	2	20	27	50	20	65.00%
emu-let-7-5p	EmuJ_001103800	Sex determining protein fem 1	167	-25.05	2	20	108	129	18	66.67%
emu-let-7-5p	EmuJ_001117600	Integrator complex subunit 9	145	-19.34	2	21	73	94	20	65.00%
a Gene Description according to WBPS14 (WS271). n/a: no annotation
